# Supplementary material for: An Overview of Genes From Cyberlindnera americana, a Symbiont Yeast Isolated From the Gut of the Bark Beetle Dendroctonus rhizophagus (Curculionidae: Scolytinae), Involved in the Detoxification Process Using Genome and Transcriptome Data
Source: PubMed Central journal article supplement (PMC6777644; doi:10.3389/fmicb.2019.02180), 2019-09-27
Supplement: Image_2.pdf [file Image_2.pdf]

# BUSCO Assessment Results

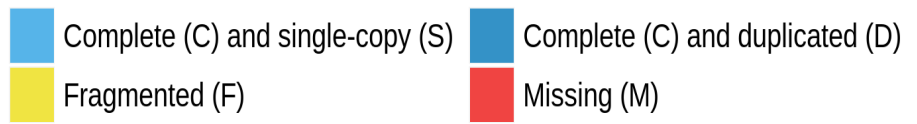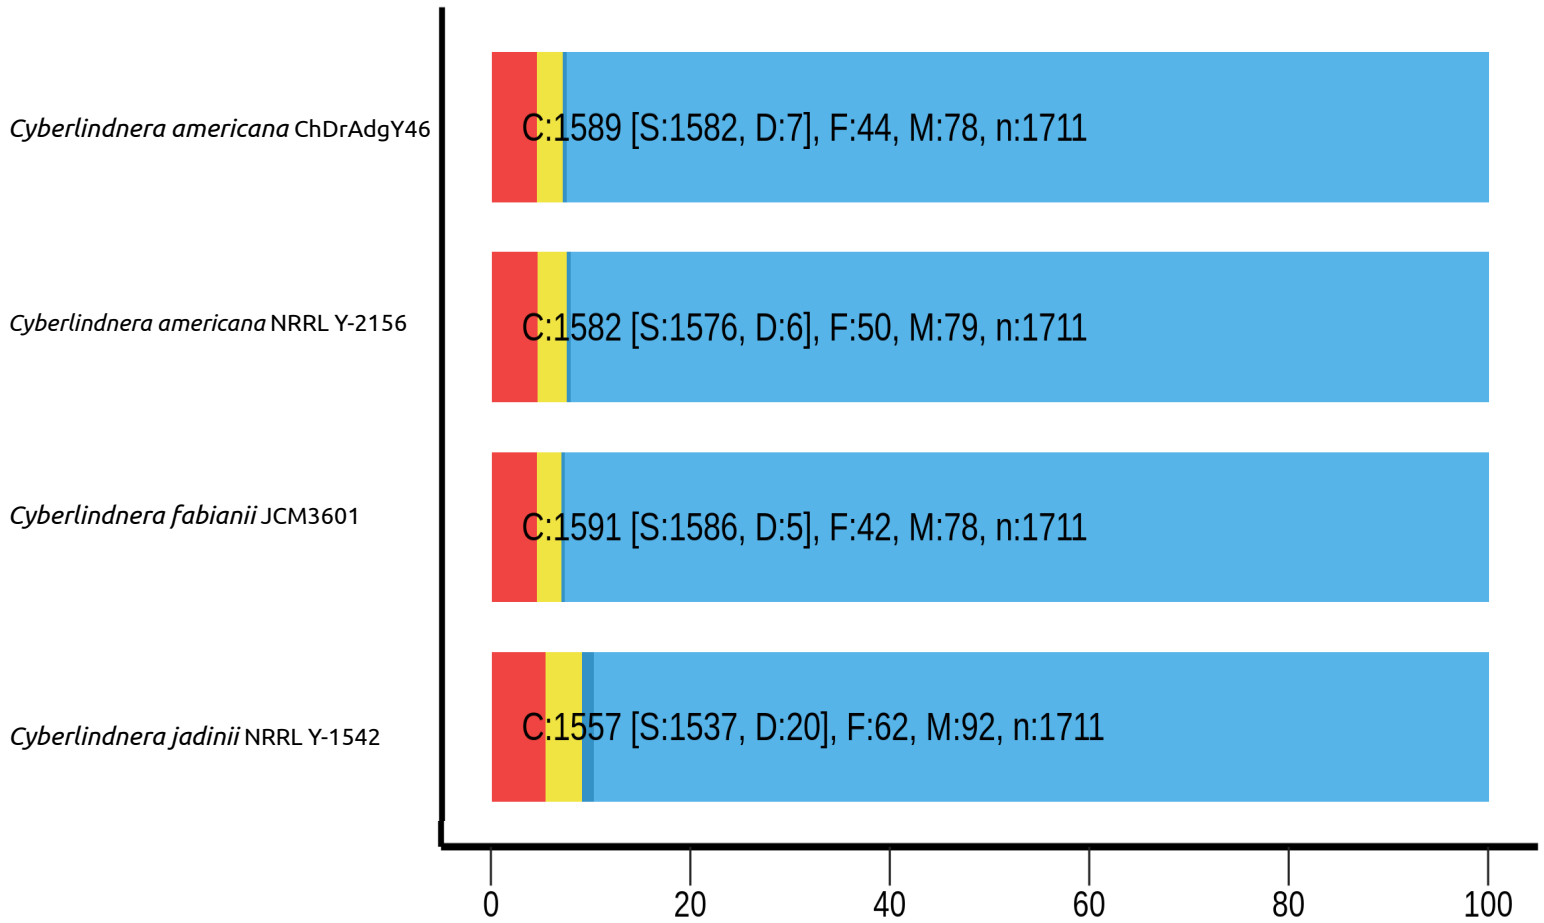

Figure S2. BUSCO Assessment in *Cyberlindnera* species
