# Supplementary material for: An Overview of Genes From Cyberlindnera americana, a Symbiont Yeast Isolated From the Gut of the Bark Beetle Dendroctonus rhizophagus (Curculionidae: Scolytinae), Involved in the Detoxification Process Using Genome and Transcriptome Data
Source: Front Microbiol. 2019 Sep 27;10:2180. doi: 10.3389/fmicb.2019.02180 (PMC6777644; doi:10.3389/fmicb.2019.02180)
Supplement: TABLE S3 — Transcripts per million reads values of genes involved in the detoxification process. [file Table_3.XLSX]

## Sheet: TMP Genes Detoxication
ID	CR1	CR2	CR3	AR1	AR2	AR3	FAMILY
g5665.t1	0.84	0.53	0.12	0.31	0	0.31	ABC
g5729.t1	1.17	2.57	1.26	3.08	1.31	1.5	ABC
g3200.t1	1.55	1.69	2.04	1.22	0.69	0.68	ABC
g4852.t1	1.93	2.4	1.63	2.22	1.46	1.83	ABC
g5656.t1	3.47	3.43	2.43	3.33	2.67	2.32	ABC
g5512.t1	4.08	5.97	4.65	4.57	3.53	2.85	ABC
g5309.t1	4.65	3.92	3.18	5.8	3.82	3.59	ABC
g4970.t1	4.69	5.36	4.51	311.44	344.2	363.1	ABC
g5727.t1	6.17	7.28	4.7	9.65	6.37	6.7	ABC
g4408.t1	8.41	6.72	5.7	9.68	4.88	9.18	ABC
g1227.t1	9.35	14.03	8.02	13.63	6.89	8.24	ABC
g3187.t1	9.42	20.03	13.74	14.15	10.42	4.91	ABC
g3575.t1	9.96	14.75	12.53	15.78	10.03	13.55	ABC
g1046.t1	16.89	20.34	14.48	16.14	13.01	15.14	ABC
g1760.t1	16.99	7.08	5.38	9.18	7.67	8.67	ABC
g4948.t1	17.92	22.75	16.52	21.63	17.09	14.49	ABC
g2073.t1	18.98	22.81	19.58	20.27	18.47	25.27	ABC
g4350.t1	35.28	36.35	31.74	47.74	29.79	30.43	ABC
g3309.t1	118.78	87.37	81.5	122.41	96.74	106.9	ABC
g4640.t1	174.59	208.24	173.4	181.72	135.3	109.27	ABC
g5598.t1	0.28	0.47	0.48	0.93	0.42	0	Aldo-keto reductase
g3188.t1	0.94	0.98	1.01	1.82	0	0.34	Aldo-keto reductase
g750.t1	2.46	2.74	2.11	3.02	3.64	8.74	Aldo-keto reductase
g3526.t1	5.46	5.25	5.63	10.26	6.46	8.74	Aldo-keto reductase
g5142.t1	5.67	13.31	6.27	7.75	4	5.11	Aldo-keto reductase
g3280.t1	6.37	12.91	6.75	8.68	5.09	4.65	Aldo-keto reductase
g4241.t1	9.3	7.98	11.5	227.05	182.3	215.58	Aldo-keto reductase
g3541.t1	9.31	9.56	8.69	13.23	11.03	7.75	Aldo-keto reductase
g2552.t1	11.44	15.11	12.81	14.11	14.18	18.21	Aldo-keto reductase
g3413.t1	17.89	27.26	23.9	26.01	47.84	29.72	Aldo-keto reductase
g4714.t1	21	30.77	19.4	18.34	15.74	10.2	Aldo-keto reductase
g5190.t1	31	28.36	34.8	24.66	9.68	18.62	Aldo-keto reductase
g2295.t1	36.37	51.5	36.34	42.41	28.16	33.77	Aldo-keto reductase
g2730.t1	39.72	56.42	37.47	42.52	29.06	32.3	Aldo-keto reductase
g5126.t1	43.25	52.5	49.58	62.8	44.68	23.76	Aldo-keto reductase
g3412.t1	46.36	53.52	50.15	54.64	47.79	50.76	Aldo-keto reductase
g5191.t1	67.87	45.66	42.5	66.73	36.53	71.88	Aldo-keto reductase
g2043.t1	115.52	93	90.86	95.56	96.81	93.9	Aldo-keto reductase
g4883.t1	174.35	122.52	115.04	164.74	124.6	187.37	Aldo-keto reductase
g708.t1	920.74	715.19	788.51	797.32	1286.27	560.77	Aldo-keto reductase
g5189.t1	1705.32	1232.02	1242.33	1204.49	1059.88	1323.57	Aldo-keto reductase
g4244.t1	0.89	1.12	0.38	0.16	0.22	0	Carboxylesterase
g1616.t1	2.33	1.34	1.39	3.89	1.52	1.5	Carboxylesterase
g900.t1	3.91	6.08	5.14	7.74	6.29	6.4	Carboxylesterase
g4849.t1	10.43	7.68	7.55	19.09	12.19	14.31	Carboxylesterase
g4850.t1	83.5	118.19	98.69	139.23	174.49	147.13	Carboxylesterase
g5662.t1	2.07	2.24	0.26	1.48	1.11	0.65	Cytochrome p450
g5675.t1	8.51	11.9	9.23	7.6	1.74	0.98	Cytochrome p451
g4830.t1	32.69	34.38	34.42	34.76	31.52	18.22	Cytochrome p452
g2931.t1	94.14	99.64	92.42	157.19	152.87	191.3	Cytochrome p453
g4592.t1	241.05	212	219.83	245.56	261.27	316.47	Cytochrome p454
g2603.t1	1.98	4.22	2.9	4.91	2.73	3.14	Flavin-containing monooxygenase
g3662.t1	2.6	3.69	2.53	2.53	2.19	0.48	Flavin-containing monooxygenase
g5051.t1	9.15	8.39	7.69	7.11	4.57	5.72	Flavin-containing monooxygenase
g4128.t1	10.26	6.88	4.34	9.26	5.31	4.15	Flavin-containing monooxygenase
g4406.t1	29.82	23.08	23.21	44.03	32.92	41.4	Flavin-containing monooxygenase
g2121.t1	44.27	48.88	50.67	51.34	47.54	52.94	Flavin-containing monooxygenase
g4246.t1	0	0	0	0	0	0	Glutathione S-transferase
g2860.t1	32.35	29.9	16.06	27.62	15.58	20.7	Glutathione S-transferase
g1774.t1	192.92	197.06	174.05	195.06	156.26	126.43	Glutathione S-transferase
g2439.t1	2.1	3.52	1.25	2.87	2.41	0.71	MATE
g1756.t1	5.19	7.51	4.6	7.4	5.79	3.21	MATE
g1251.t1	8.91	13.75	8.53	10.79	6.66	7.25	MATE
g4529.t1	9.83	6.61	6.93	9.06	6.88	7.93	MATE
g1697.t1	16.76	15.06	12.37	15.42	12	13.95	MATE
g2934.t1	62.21	67.65	56.54	61.19	36.22	48.41	MATE
g3493.t1	0	0	0	0	0	0	MFS
g2756.t1	0.15	0.25	0.26	1.01	0	0.22	MFS
g5305.t1	0.16	0	0.54	0.87	0.23	0	MFS
g2065.t1	0.25	0.52	0.22	0.14	0	0	MFS
g4245.t1	0.31	0.13	0.26	0	0	0.45	MFS
g3691.t1	0.4	1.91	0.69	0.3	0.2	0	MFS
g1927.t1	0.42	0.47	0.61	0.47	0.21	0	MFS
g3690.t1	0.43	1.08	0.62	0.8	1.29	0.63	MFS
g1188.t1	0.44	0.99	0.77	2.47	0.22	0.87	MFS
g733.t1	0.47	0.79	0.27	0.35	0.7	0	MFS
g2757.t1	0.51	1.14	0.44	0.56	1.01	0.75	MFS
g2673.t1	0.6	2.01	1.42	0.83	1.79	0.44	MFS
g3547.t1	0.67	2.4	1.02	0.37	0.5	0.49	MFS
g2157.t1	0.8	3.91	2.07	2.96	4.39	0.39	MFS
g2463.t1	0.82	1.03	0.59	1.67	0.61	0	MFS
g4243.t1	0.89	0.75	0.39	0.66	0.44	0.22	MFS
g4129.t1	0.89	1.5	1.93	0.99	0.45	0.44	MFS
g658.t1	1.05	1.62	1.06	1.17	0.52	0.52	MFS
g2755.t1	1.06	1.15	1.18	1.35	0.45	0	MFS
g4365.t1	1.11	0.82	0.36	1.71	0.21	0.21	MFS
g1492.t1	1.21	2.37	1.74	1.79	0.6	0.99	MFS
g1574.t1	1.28	2.68	2.07	3.37	1.67	0.94	MFS
g1957.t1	1.36	1.78	1.57	1.85	4.07	0.89	MFS
g749.t1	1.65	1.51	0.65	0.5	0.67	0.44	MFS
g3535.t1	1.67	1.28	1.32	1.18	0	0.89	MFS
g368.t1	1.73	2.79	1	5.62	1.51	5.31	MFS
g5102.t1	1.92	3.35	2.9	2.84	2.63	0.7	MFS
g2699.t1	2.25	1.78	1.49	3.25	1.19	1.95	MFS
g1262.t1	2.26	2.46	1.96	1.04	0.4	0.59	MFS
g1177.t1	2.65	3.07	1.42	2.25	0.76	3.16	MFS
g3490.t1	2.65	3.87	1.69	3.11	1.67	2.67	MFS
g2038.t1	2.76	1.42	1.33	1.88	0.23	4.06	MFS
g588.t1	2.96	3.14	2.42	2.77	1.86	1.6	MFS
g5403.t1	3.01	3.04	1.43	2.18	0.68	1.77	MFS
g674.t1	3.14	3.16	1.36	3.49	1.17	1.15	MFS
g5131.t1	3.15	1.61	1.06	3.5	2.35	3.86	MFS
g3371.t1	3.31	1.09	2.74	3.85	0.65	1.91	MFS
g2240.t1	3.48	3.28	2.53	5.89	1.25	1.85	MFS
g345.t1	3.5	4.35	2.77	3.9	2.96	0.67	MFS
g1403.t1	3.51	2.43	0.92	1.53	0.91	2.7	MFS
g2703.t1	3.58	3	2.21	4.17	3.56	1	MFS
g2067.t1	3.82	3.32	2.74	7.48	2.56	5.63	MFS
g3603.t1	3.91	3.79	2.34	2.68	0	3.32	MFS
g3218.t1	3.95	8.89	3.55	4.75	3.54	5.11	MFS
g4536.t1	3.99	7.7	4.64	8.28	3.88	5.35	MFS
g2804.t1	4.02	3.71	3.6	4.62	3.11	4.97	MFS
g1989.t1	4.1	6.75	0.95	6.49	4.71	5.8	MFS
g4297.t1	4.39	10.89	4.7	15.01	5.24	2.32	MFS
g2282.t1	4.44	3.96	4.08	3.24	5.19	5.52	MFS
g5054.t1	4.59	5.91	2.38	3.74	2.52	3.15	MFS
g304.t1	4.61	3.51	1.75	1.92	1.72	3.61	MFS
g3131.t1	4.64	4.13	3.55	5.93	3.07	3.62	MFS
g3613.t1	4.79	6.26	3.99	3.95	2.12	1.83	MFS
g3494.t1	5.13	7.32	6.52	4.26	3.4	2.99	MFS
g3092.t1	5.22	4.67	2.86	7.74	2.86	1.53	MFS
g2626.t1	5.37	6.89	2.59	0.66	0.22	1.76	MFS
g5645.t1	5.54	6.66	3.37	8.33	4.26	3.09	MFS
g1216.t1	5.7	8.5	6.67	7.3	4.06	4.62	MFS
g3546.t1	5.96	9.73	7.59	2.39	1.73	2.68	MFS
g1511.t1	6.02	5.57	6.27	2.92	2.54	3.18	MFS
g5693.t1	6.41	7.08	5.54	7.13	6.78	7.36	MFS
g2371.t1	6.7	9.6	7.62	9.92	6.92	7.79	MFS
g2364.t1	6.75	15.88	11.38	5.12	7.13	11.85	MFS
g854.t1	7.01	7.24	3.67	5.69	2.4	2.8	MFS
g5138.t1	7.2	11.21	7.92	8.18	6.73	5.74	MFS
g4206.t1	7.21	10.74	6.47	14.1	12.14	10.82	MFS
g3525.t1	7.22	13.01	9.24	2.51	5.17	1.99	MFS
g436.t1	7.51	3.73	3.05	6.48	2.98	3.38	MFS
g4255.t1	8.59	6.81	5.37	7.61	4.04	3.74	MFS
g2737.t1	8.64	14.4	10.45	20.93	12.32	7.07	MFS
g1220.t1	8.65	12.19	8.89	13.39	7.46	6.05	MFS
g5425.t1	8.79	16.73	12.09	24.8	13.61	6.93	MFS
g2826.t1	9.1	5.86	4.07	4.22	3.86	8.26	MFS
g675.t1	9.15	7.81	5.37	3.12	0.66	0.65	MFS
g3694.t1	9.2	6.48	5.27	7.08	4.05	6.18	MFS
g74.t1	9.24	12.52	8.52	5.48	2.9	3.29	MFS
g414.t1	9.38	10.62	5.75	6.97	3.57	2.4	MFS
g1218.t1	9.46	14.99	8.98	5.26	18.95	10.33	MFS
g4014.t1	9.98	15.69	8.64	30.8	20.07	4.83	MFS
g5405.t1	10.42	9.62	5.56	29.15	26.19	29.85	MFS
g5457.t1	11.23	10.56	9.2	8.83	9.18	8.16	MFS
g3611.t1	12.21	13.66	15.4	4.34	3.29	6.98	MFS
g5507.t1	12.22	4.72	2.23	1.43	0.96	1.18	MFS
g5057.t1	12.54	12.53	6.85	8.6	4.68	8.66	MFS
g5469.t1	12.98	19.41	11.08	19.06	9.45	10.76	MFS
g575.t1	13	15.02	9.66	21.1	13.04	12.38	MFS
g4968.t1	13.69	20.87	12.37	3.81	7.57	3.51	MFS
g3882.t1	14.03	16.49	11.2	33.14	22.85	30.28	MFS
g440.t1	14.18	27.04	24.13	14.34	9.45	4.26	MFS
g5487.t1	15.57	21.5	16.07	11.83	8.29	11.9	MFS
g2035.t1	16.5	16.76	11.43	13.86	13.24	23.19	MFS
g1510.t1	16.76	20.51	20.6	12.2	11.24	7.83	MFS
g2318.t1	17.15	27.4	14.83	13.75	10.35	8.97	MFS
g4434.t1	17.46	26.43	13.17	20.93	10.48	18.62	MFS
g3348.t1	18	13.14	12.83	9.25	6.01	6.32	MFS
g4879.t1	18.84	24.1	13.15	23.65	12.63	19.68	MFS
g742.t1	19.58	19.23	12.06	11.67	11.36	9.15	MFS
g5489.t1	20.17	30.49	21.6	21.12	31.3	27.72	MFS
g3094.t1	20.36	24.88	22.36	50.73	28.41	31.31	MFS
g1263.t1	21	25.49	18.17	10.78	7	7.84	MFS
g3166.t1	22.03	32.54	23.37	24.55	12.81	13.58	MFS
g1442.t1	22.2	24.94	15.51	7.03	4.59	5.27	MFS
g4938.t1	23.19	19.81	17.8	35.68	19.27	19.34	MFS
g3612.t1	23.2	24.82	14.56	8.72	9.03	2.16	MFS
g2625.t1	24.56	66.85	45.27	5.23	2.72	4.02	MFS
g1729.t1	25.8	28.1	23.21	43.62	20.17	16.63	MFS
g2951.t1	26.51	35.75	30.81	21.91	22.36	29.19	MFS
g1037.t1	26.77	45.57	25.69	33.85	21.56	10.93	MFS
g3307.t1	27.65	30.77	25.77	36.74	35.86	16.45	MFS
g2747.t1	27.8	14.44	12.36	5.98	2.53	6.1	MFS
g5583.t1	28.71	49.45	23.99	24.74	20.52	9.35	MFS
g1955.t1	32.38	44.72	31.39	50.69	33.64	25.48	MFS
g1577.t1	32.69	29.24	16.59	10.36	10.55	12.46	MFS
g2920.t1	35.12	34.36	28.85	3.48	1.56	6.13	MFS
g4546.t1	36.04	34.62	30.29	32.2	28.17	28.21	MFS
g1804.t1	37.02	51.58	38.84	77.75	57.15	54.74	MFS
g2348.t1	39.34	49.03	35.05	43.81	34.66	19.88	MFS
g3602.t1	39.48	29.73	24	26.33	19.16	22.18	MFS
g3534.t1	41.2	47.94	36.91	36.87	22.07	15.93	MFS
g3816.t1	42.82	79.04	34.91	31.48	23.12	11.15	MFS
g5694.t1	52.39	37.75	30.82	51.28	20.96	47.65	MFS
g1763.t1	57.58	58.27	47.1	41.71	41.54	28.54	MFS
g5674.t1	61.8	108.92	83.47	64.19	36.98	23.36	MFS
g2241.t1	62.6	51.57	39.06	57.33	47.5	56.95	MFS
g3316.t1	66.98	99.24	74.08	33.69	20.07	19.26	MFS
g57.t1	71.9	85.91	72.08	101.47	77.97	83.15	MFS
g2261.t1	82.12	75.01	71.61	134.21	198.14	149.17	MFS
g4572.t1	86.56	131.75	100.73	63.19	91.45	21.9	MFS
g694.t1	97.65	125.28	102.57	62.82	42.17	16.86	MFS
g4612.t1	98.19	94.15	84.48	98.65	77.32	79.88	MFS
g35.t1	108.68	156.72	136.43	54.85	110.32	26.52	MFS
g4578.t1	151.47	109.69	86.76	50.46	29.53	49.71	MFS
g5671.t1	151.89	240	204.81	178.87	167.45	151.53	MFS
g5354.t1	168.25	148.44	104.75	277.62	142.7	115.59	MFS
g1581.t1	238.66	483.67	390.97	406	324.03	200.66	MFS
g4460.t1	239.85	223.01	216.51	304.83	256.29	167.74	MFS
g4183.t1	245.38	316.39	241.54	166.52	178.39	82.39	MFS
g4064.t1	250	338.15	293.39	276.5	226.03	130.6	MFS
g5221.t1	250.92	337.28	293.67	216.2	327.2	229.82	MFS
g1542.t1	275.92	611.18	434.77	733.18	678.74	211.96	MFS
g5718.t1	420.2	378.54	384.2	100.23	189.38	163.53	MFS
g1111.t1	431.96	428.27	333.61	93.83	109.77	120.58	MFS
g5629.t1	636.06	709.46	645.67	781.85	808.4	449.63	MFS
g1501.t1	1355.72	1376.79	1087.11	972.27	807.04	677.94	MFS
g1303.t1	1522.92	1774.35	1481.76	796.87	890.88	483.44	MFS
g902.t1	3.3	3.97	1.94	1.05	1.77	0.87	Multicopper-containing oxidases
